# Supplementary material for: Tailoring the microstructure and charge transport in conjugated polymers by alkyl side-chain engineering
Source: Royal Society of Chemistry journal article supplement (doi:10.1039/c5tc03000e), 2015-11-24

## SUPPORTING INFORMATION

### Tailoring the microstructure and charge transport in conjugated polymers by alkyl side-chain engineering

*Sadiara Fall, Laure Biniek, Yaroslav Odarchenko, Denis V. Anokhin, Grégoire de Tournadre, Patrick Lévêque, Nicolas Leclerc, Dimitri A. Ivanov,\* Olivier Simonetti, Louis Giraudet, and Thomas Heiser\**

#### SPACE CHARGE LIMITED DEVICES

**Figure S1:** Current-Voltage curves of space-charge-limited hole-only devices [structure: ITO/PEDOT:PSS/Polymer/PEDOT:PSS/Al] using different polymer layers and thicknesses ( $L$ ). We plotted  $I \times L$  as a function of  $V/L$  to compare the results obtained at constant electric fields. In this way, differences in current due to a field-dependent mobility can be minimized.

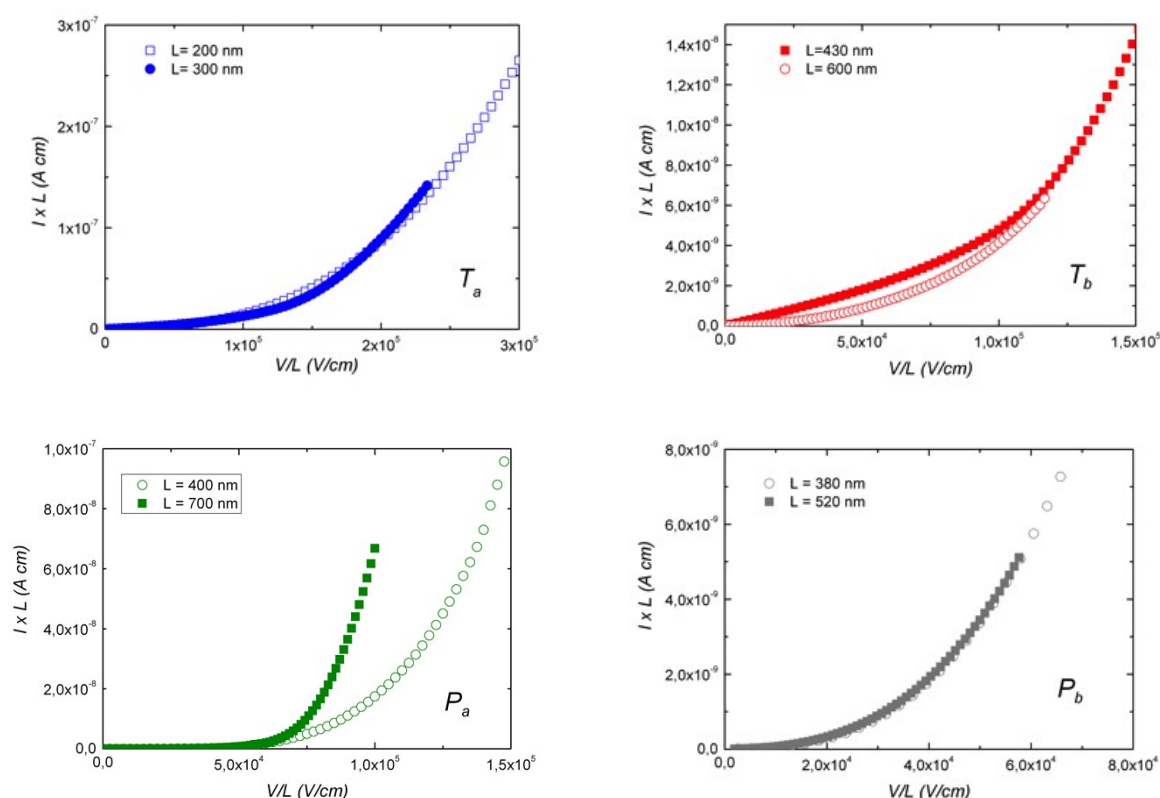

**Figure S2:** Current-Voltage curves (in linear and logarithmic scale), obtained on several  $P_a$  based SCLC devices with a constant film thickness. The results illustrate the significant scattering in SCLC data for this particular polymer.

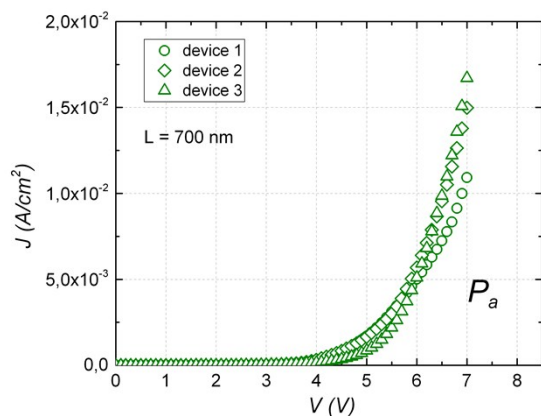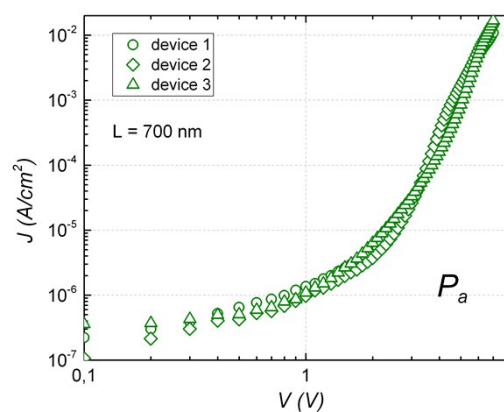

## ORGANIC FIELD EFFECT TRANSISTORS

**Figure S3:** OFET output characteristics measured at room temperature, with a 20 $\mu$ m channel length and 10 mm channel width.

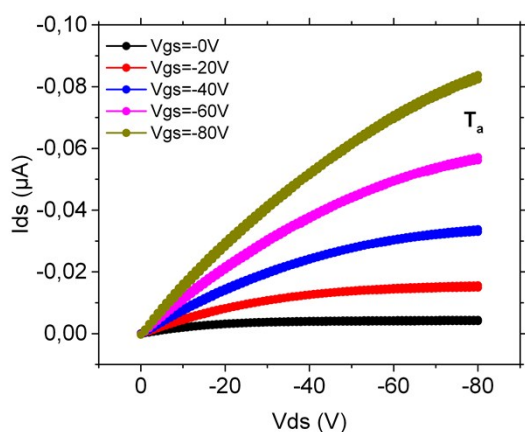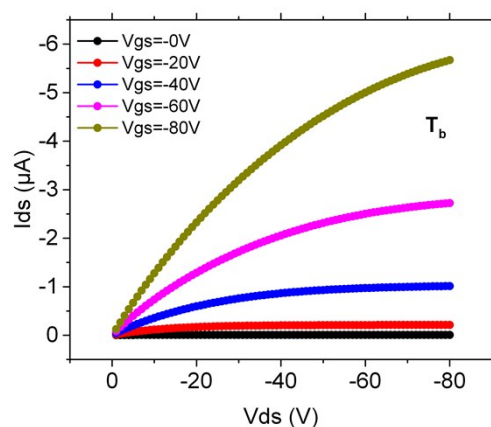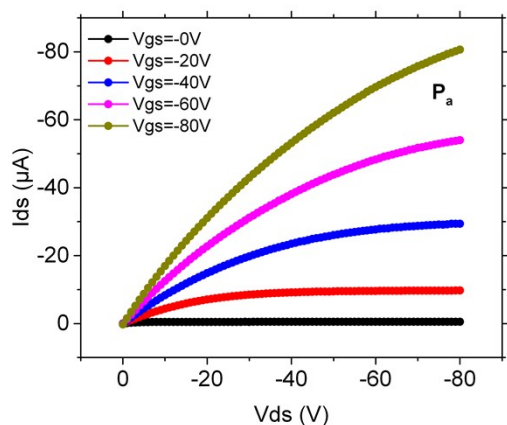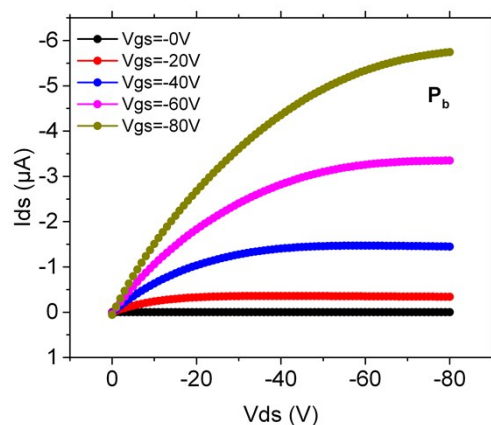

**Figure S4:** OFET transfer characteristics measured at different temperatures. For each polymer, the threshold voltage was assumed to be independent on temperature, and equal to  $-6$  V for  $T_a$ , and zero for  $T_b$ ,  $P_a$  and  $P_b$ , respectively. The solid lines are obtained by adjusting the experimental curves to  $I_D = c \cdot (V_g - V_T)^k$ , with  $V_T$  being the threshold voltage and  $c$  a constant. According to Vissenberg's transistor model,<sup>1</sup> the fitting parameter  $k$  is expected to

vary with temperature as  $k = 2 \frac{E_o}{kT} - 1$ .

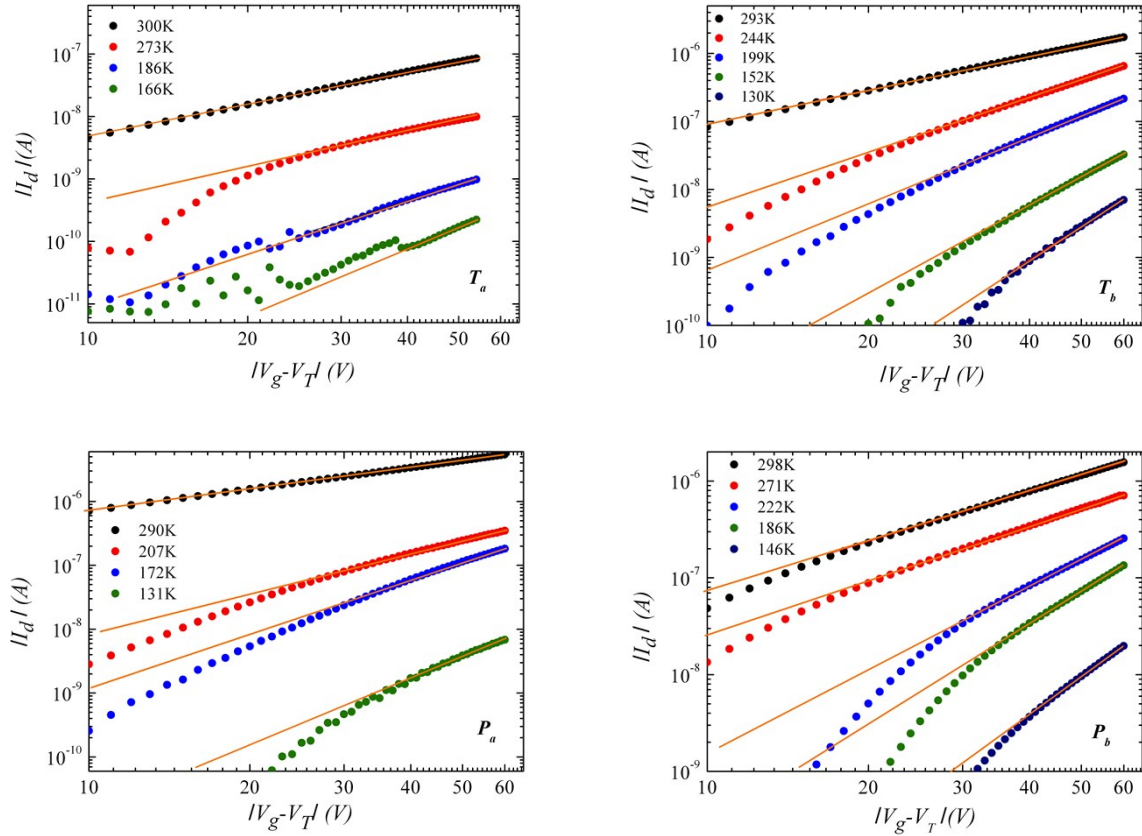

<sup>1</sup>a) M. C. J. M. Vissenberg, M. Matters, *Phys. Rev. B* **1998**, 57, 12964 b) J. J. Brondijk, W. S. C. Roelofs, S. G. J. Mathijssen, A. Shehu, T. Cramer, F. Biscarini, P. W. M. Blom, D. M. de Leeuw, *Phys. Rev. Lett.* **2012**, 109, 56601

**Figure S5:** The fitting parameter  $k$ , extracted from the solid lines in Figure S4, are plotted as a function of inverse temperature. The solid lines are obtained by fitting the experimental data to  $k = 2\frac{E_o}{kT} - 1$ . The corresponding  $E_o$  values are given in Table 1 of the main article and are used together with Equation 4 to plot the field-effect mobility as a function of charge carrier density in Figure 4.

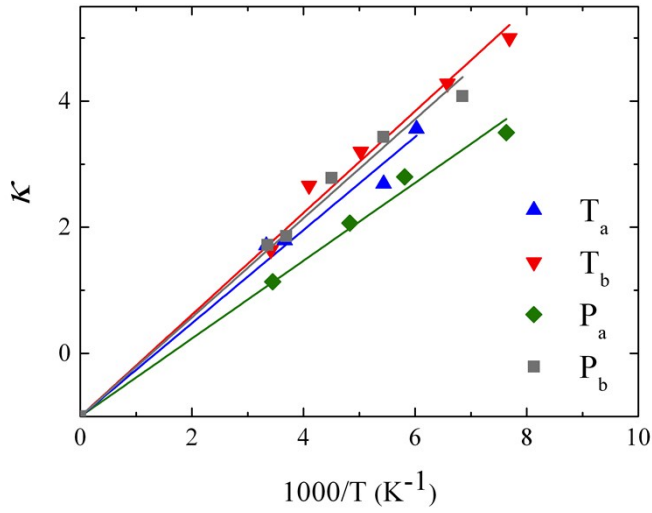

## GIWAXS

**Figure S6:** GIWAXS pattern on  $P_b$  OFET (a) and SCLC (b) devices

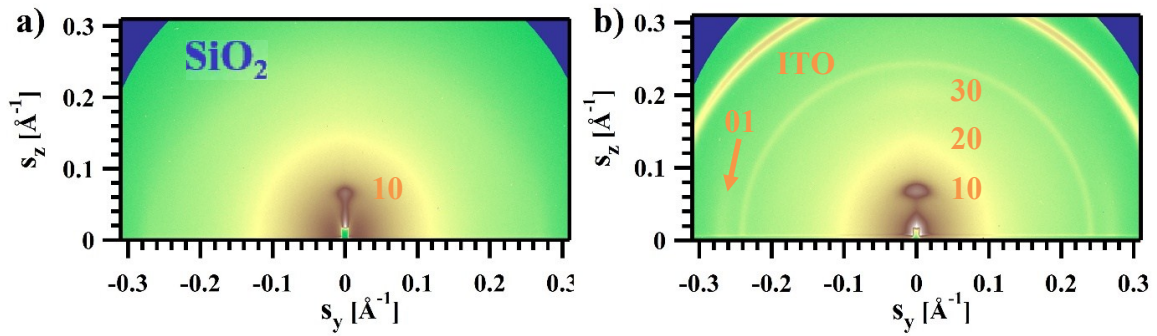

Supplement: c5tc03000e1.pdf [file c5tc03000e1.pdf]
